# Supplementary material for: Potential Benefits and Harms of a Peer Support Social Network Service on the Internet for People With Depressive Tendencies: Qualitative Content Analysis and Social Network Analysis
Source: PubMed Central journal article supplement (PMC2762850; doi:10.2196/jmir.1142), 2009-07-23
Supplement: jmir_v11i3e29_app2.pdf [file jmir_v11i3e29_app2.pdf]

## Multimedia Appendix 2: Framework of analytic methodology

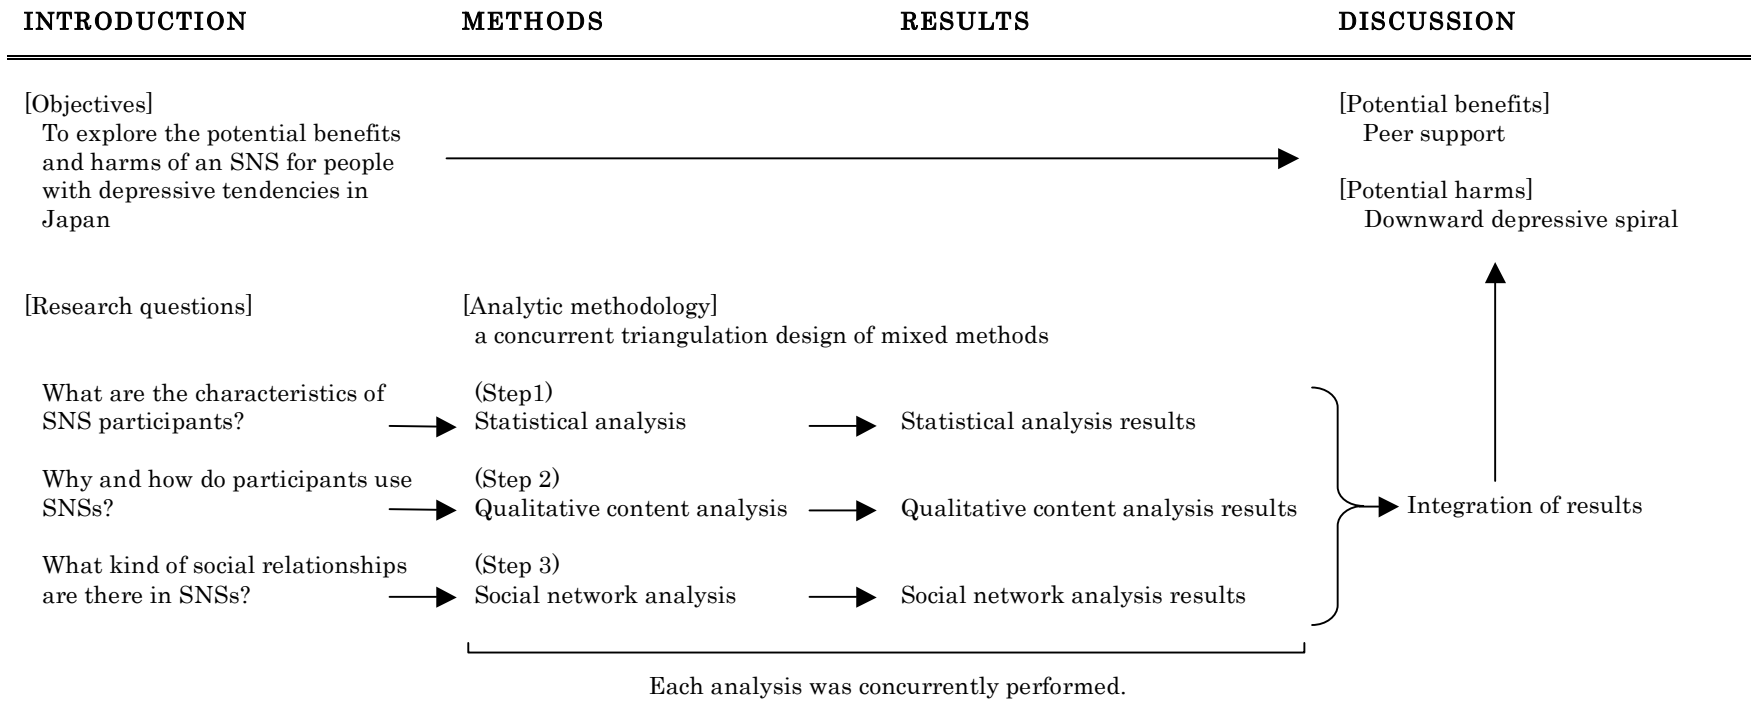

Takahashi Y, Uchida C, Miyaki K, Sakai M, Shimbo T, Nakayama T  
 Potential Benefits and Harms of a Peer Support Social Network Service on the Internet for  
 People With Depressive Tendencies: Qualitative Content Analysis and Social Network Analysis  
 J Med Internet Res 2009;11(3):e29  
 URL: <http://www.jmir.org/2009/3/e29/>  
 doi: 10.2196/jmir.1142
